# Supplementary material for: Genetically encoded FRET sensors using a fluorescent unnatural amino acid as a FRET donor
Source: Royal Society of Chemistry journal article supplement (doi:10.1039/c6ra17375f), 2016-01-01

## Supplementary Information

Genetically encoded FRET sensors containing a fluorescent unnatural amino acid  
as a FRET donor

Wooseok Ko, Sanggil Kim, Sunghyun Lee, Kyubong Jo\*, Hyun Soo Lee\*

*Department of Chemistry, Sogang University, Seoul 121-742, Republic of Korea*

**Table S1.** Measurements of the distance of V104 and L155 from Leu5 in GlnBP, and calculation of % changes in the distances upon ligand binding. The distances between the  $\alpha$ -carbons were measured using *PyMOL*. Five residues (S116, G117, F136, P137, and N138) showing the largest distance change are boldfaced. PDB IDs used for the measurements are 1GGG (*apo*-form) and 1WDN (ligand-bound form).

| Residue     | Distance from Leu5 in the ligand-free form (Å) | Distance from Leu5 in the ligand-bound form (Å) | % change of the distance (%) |
|-------------|------------------------------------------------|-------------------------------------------------|------------------------------|
| V104        | 48.03                                          | 40.21                                           | 16.28                        |
| K105        | 48.81                                          | 43.34                                           | 11.21                        |
| D106        | 51.00                                          | 42.18                                           | 17.29                        |
| L107        | 54.82                                          | 42.92                                           | 21.71                        |
| D108        | 55.62                                          | 45.87                                           | 17.53                        |
| G109        | 55.08                                          | 45.50                                           | 17.39                        |
| K110        | 51.27                                          | 43.23                                           | 15.68                        |
| V111        | 49.26                                          | 40.61                                           | 17.56                        |
| V112        | 45.50                                          | 37.20                                           | 18.24                        |
| A113        | 43.64                                          | 34.18                                           | 21.68                        |
| V114        | 40.52                                          | 30.66                                           | 24.33                        |
| K115        | 38.40                                          | 27.12                                           | 29.38                        |
| <b>S116</b> | <b>39.50</b>                                   | <b>26.15</b>                                    | <b>33.80</b>                 |
| <b>G117</b> | <b>37.20</b>                                   | <b>23.82</b>                                    | <b>35.97</b>                 |
| T118        | 34.97                                          | 24.33                                           | 30.43                        |
| G119        | 35.10                                          | 26.40                                           | 24.79                        |
| S120        | 37.29                                          | 28.99                                           | 22.26                        |
| V121        | 40.21                                          | 30.08                                           | 25.19                        |
| D122        | 40.20                                          | 30.17                                           | 24.95                        |
| Y123        | 39.96                                          | 32.28                                           | 19.22                        |
| A124        | 42.83                                          | 34.58                                           | 19.26                        |
| K125        | 45.08                                          | 35.25                                           | 21.81                        |
| A126        | 44.96                                          | 36.07                                           | 19.77                        |
| N127        | 44.78                                          | 38.02                                           | 15.10                        |
| I128        | 46.82                                          | 39.67                                           | 15.27                        |
| K129        | 50.43                                          | 42.30                                           | 16.12                        |
| T130        | 49.96                                          | 41.18                                           | 17.57                        |
| K131        | 53.20                                          | 43.39                                           | 18.44                        |
| D132        | 50.95                                          | 40.31                                           | 20.88                        |
| L133        | 47.43                                          | 36.55                                           | 22.94                        |
| R134        | 46.61                                          | 34.54                                           | 25.90                        |
| Q135        | 43.85                                          | 30.82                                           | 29.71                        |
| <b>F136</b> | <b>42.37</b>                                   | <b>28.82</b>                                    | <b>31.98</b>                 |
| <b>P137</b> | <b>40.38</b>                                   | <b>25.23</b>                                    | <b>37.52</b>                 |

|             |              |              |              |
|-------------|--------------|--------------|--------------|
| <b>N138</b> | <b>37.90</b> | <b>25.01</b> | <b>34.01</b> |
| I139        | 37.38        | 27.26        | 27.07        |
| D140        | 38.33        | 28.86        | 24.71        |
| N141        | 41.72        | 30.50        | 26.89        |
| A142        | 41.65        | 31.90        | 23.41        |
| Y143        | 41.00        | 33.21        | 19.00        |
| M144        | 44.06        | 34.95        | 20.68        |
| E145        | 46.03        | 36.48        | 20.75        |
| L146        | 45.32        | 37.95        | 16.26        |
| G147        | 45.84        | 39.08        | 14.75        |
| T148        | 49.53        | 40.87        | 17.48        |
| N149        | 51.03        | 42.56        | 16.60        |
| R150        | 50.77        | 41.03        | 19.18        |
| A151        | 47.78        | 39.7         | 16.91        |
| D152        | 48.01        | 41.29        | 14.00        |
| A153        | 44.33        | 38.26        | 13.69        |
| V154        | 41.16        | 34.52        | 16.13        |
| L155        | 38.72        | 32.8         | 15.29        |

**Figure S1.** MALDI-TOF MS analyses of trypsin-digested EGFP-GlnBP-WT and EGFP-GlnBP mutant proteins containing CouA. Peptide X (QFPNIDNAYMELGTNR) contains F136 and N138; each residue is substituted by CouA in Peptide X-136CouA or X-138CouA. MALDI TOF MS data for the peptide products of (a) EGFP-GlnBP-WT, (b) EGFP GlnBP F136CouA, (c) EGFP-GlnBP-N138CouA, (d) EGFP-4-GlnBP-N138CouA, (e) EGFP-7-GlnBP-N138CouA, and (f) EGFP-10-GlnBP-N138CouA.

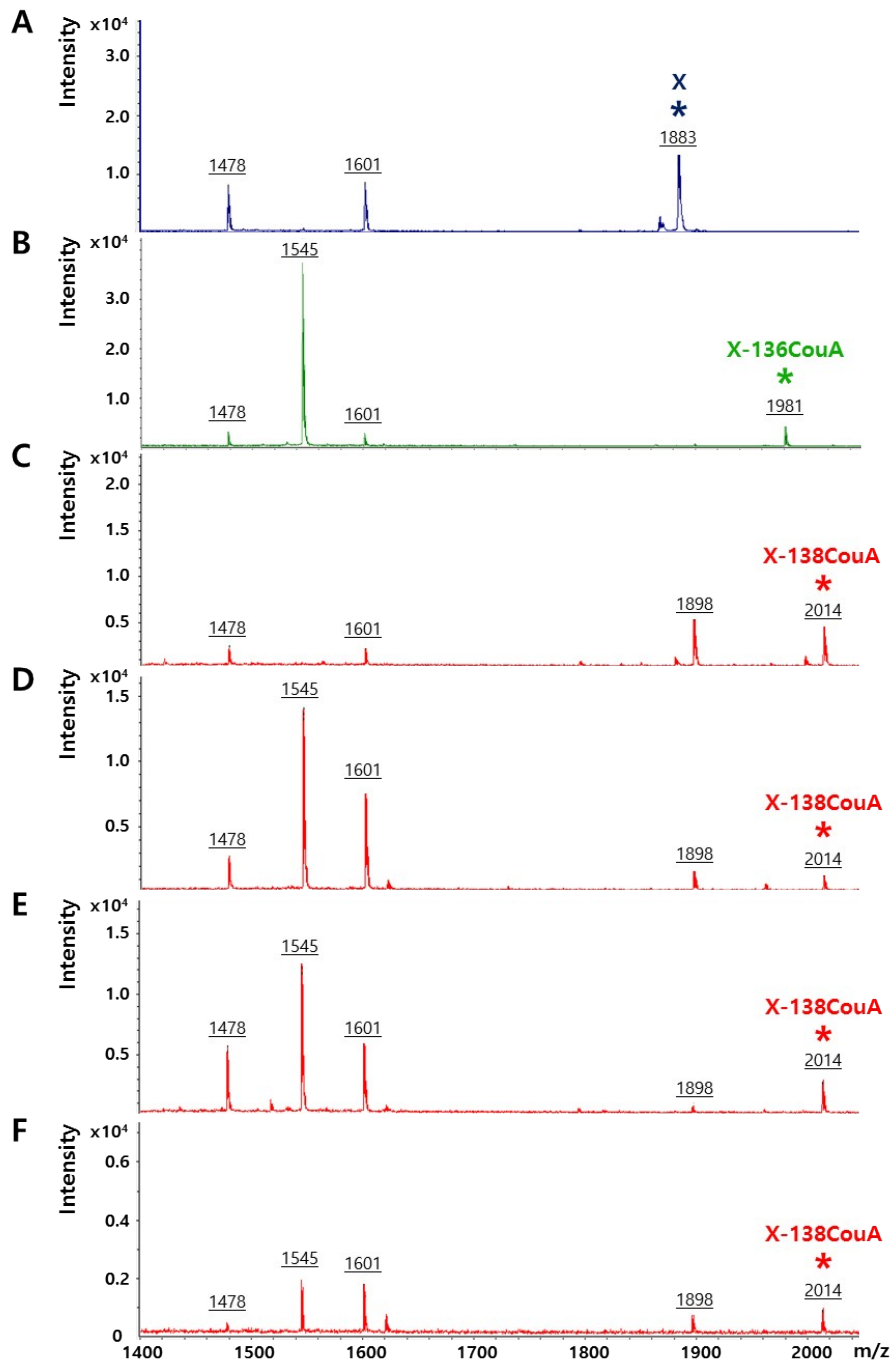

**Figure S2.** SDS-PAGE analyses of purified sensor proteins. EGFP-GlnBP mutant proteins with linkers of different length were expressed in the presence of 1 mM CouA and the required evolved tRNA/aaRS pair, and then purified by Ni-NTA affinity chromatography. The purified proteins were analyzed by SDS-PAGE, and visualized by Coomassie-staining (left) and fluorescence (right).

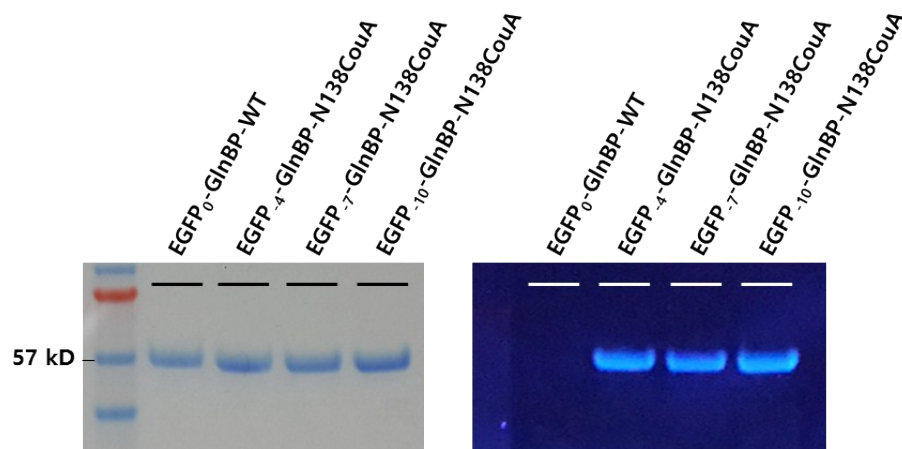

Supplement: c6ra17375f1.pdf [file c6ra17375f1.pdf]
